# Supplementary material
Source: publisher figshare collection journal article supplement (https://acs.figshare.com/ndownloader/files/14152022)
Supplement: Supplementary file 1 [file 14152022]

# Supporting Information for “Correlated Roles of Temperature and Dimensionality for Multiple Exciton Generation and Electronic Structures in Quantum Dot Superlattices”

I-Ya Chang,<sup>†</sup> DaeGwi Kim,<sup>‡</sup> and Kim Hyeon-Deuk<sup>\*,†</sup>

*Department of Chemistry, Kyoto University, Kyoto, 606-8502, Japan, and Department of Applied Physics, Osaka City University, Osaka 558-8585, Japan*

E-mail: kim@kuchem.kyoto-u.ac.jp

---

<sup>\*</sup>To whom correspondence should be addressed

<sup>†</sup>Department of Chemistry, Kyoto University, Kyoto, 606-8502, Japan

<sup>‡</sup>Department of Applied Physics, Osaka City University, Osaka 558-8585, Japan

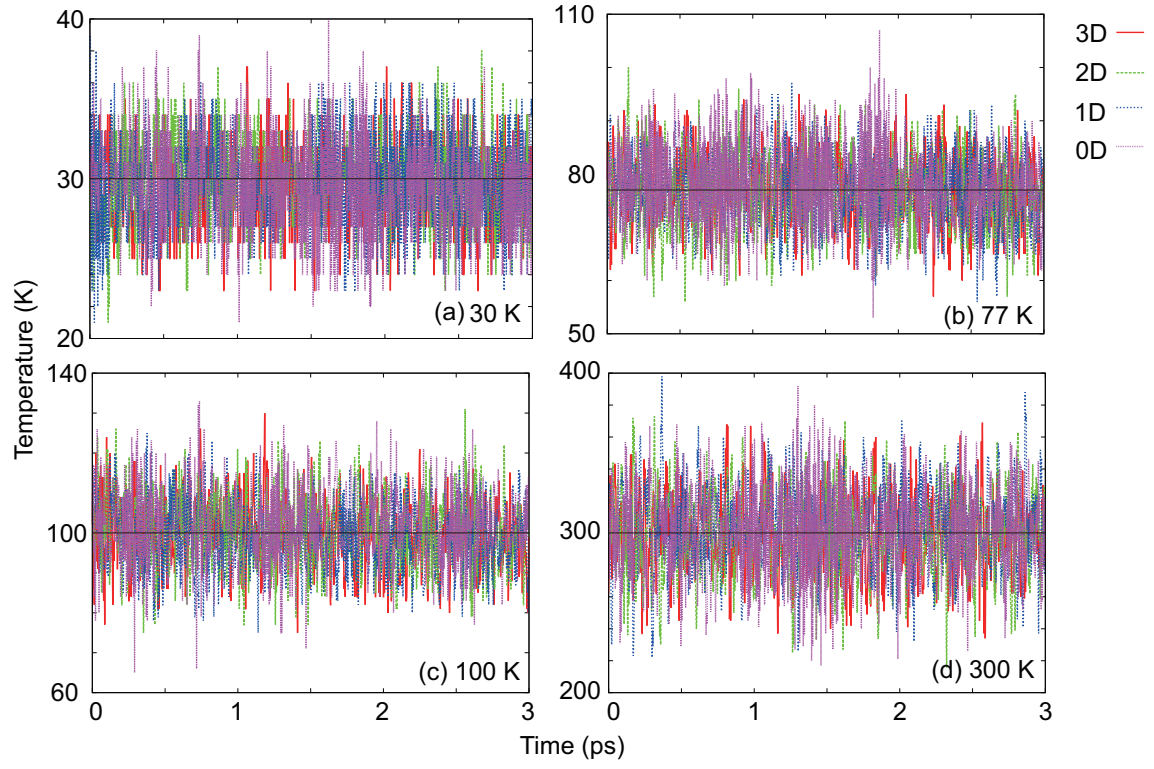

Figure S1: Real-time temperature fluctuations of the  $\text{Si}_{29}\text{H}_{24}$  QDSLs and 0D  $\text{Si}_{29}\text{H}_{24}$  QD at (a) 30 K, (b) 77 K, (c) 100 K and (d) 300 K.

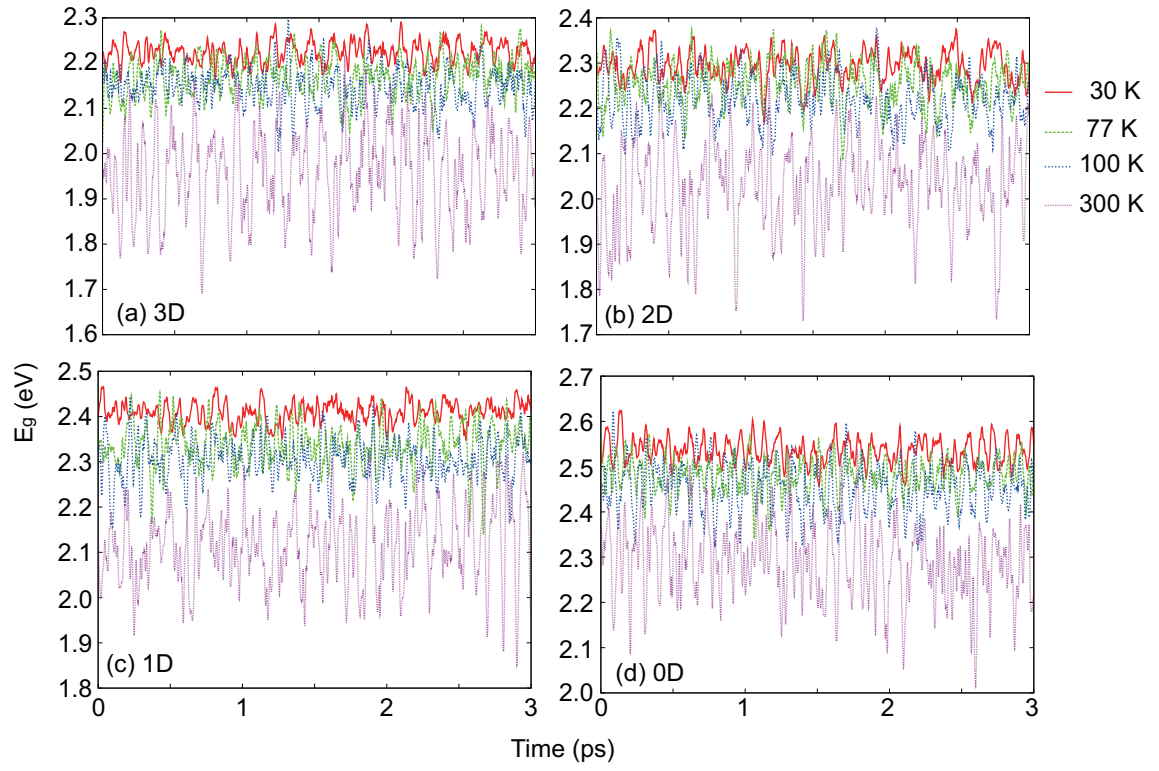

Figure S2: Real-time fluctuations of temperature-dependent band-gap energies of the  $\text{Si}_{29}\text{H}_{24}$  QDSLs and 0D  $\text{Si}_{29}\text{H}_{24}$  QD.

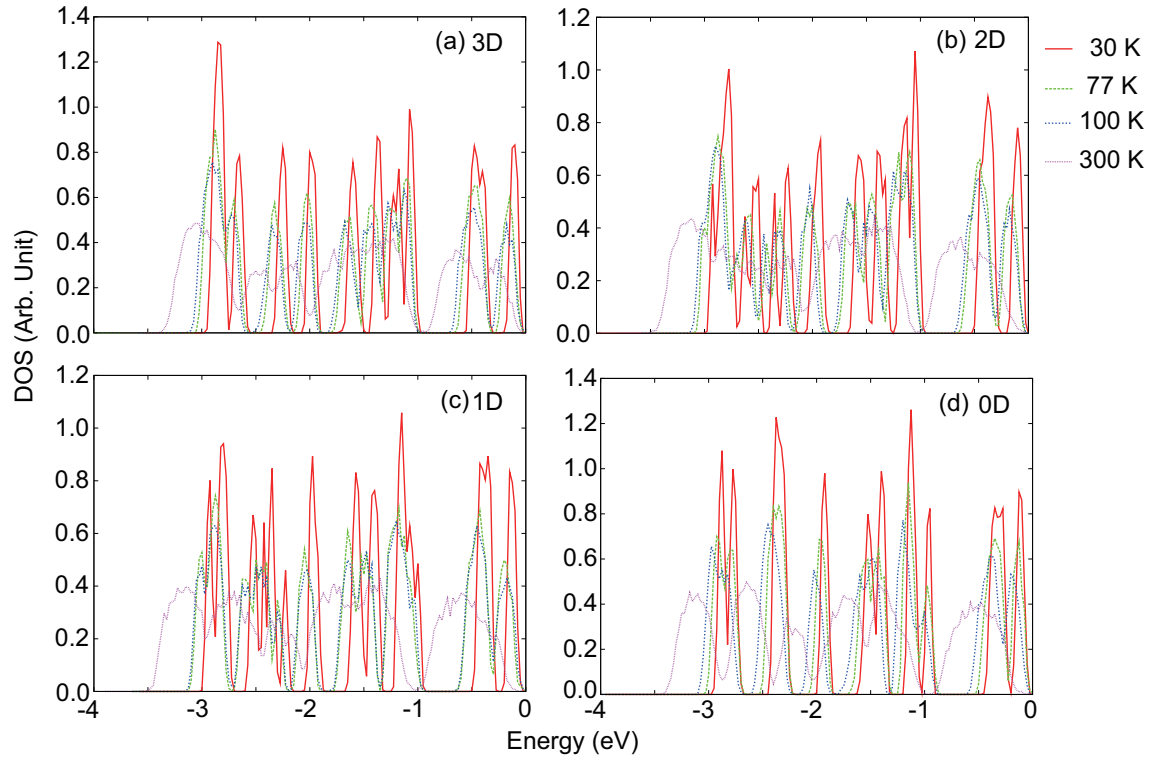

Figure S3: VB DOS for (a) 3D, (b) 2D, and (c) 1D  $\text{Si}_{29}\text{H}_{24}$  QDSLs and (d) 0D  $\text{Si}_{29}\text{H}_{24}$  QD. The VB DOS was obtained by counting the number of VB states fluctuating at each temperature along the 3 ps microcanonical MD trajectories. Each highest state was shifted to end with 0 eV for their clear comparison.

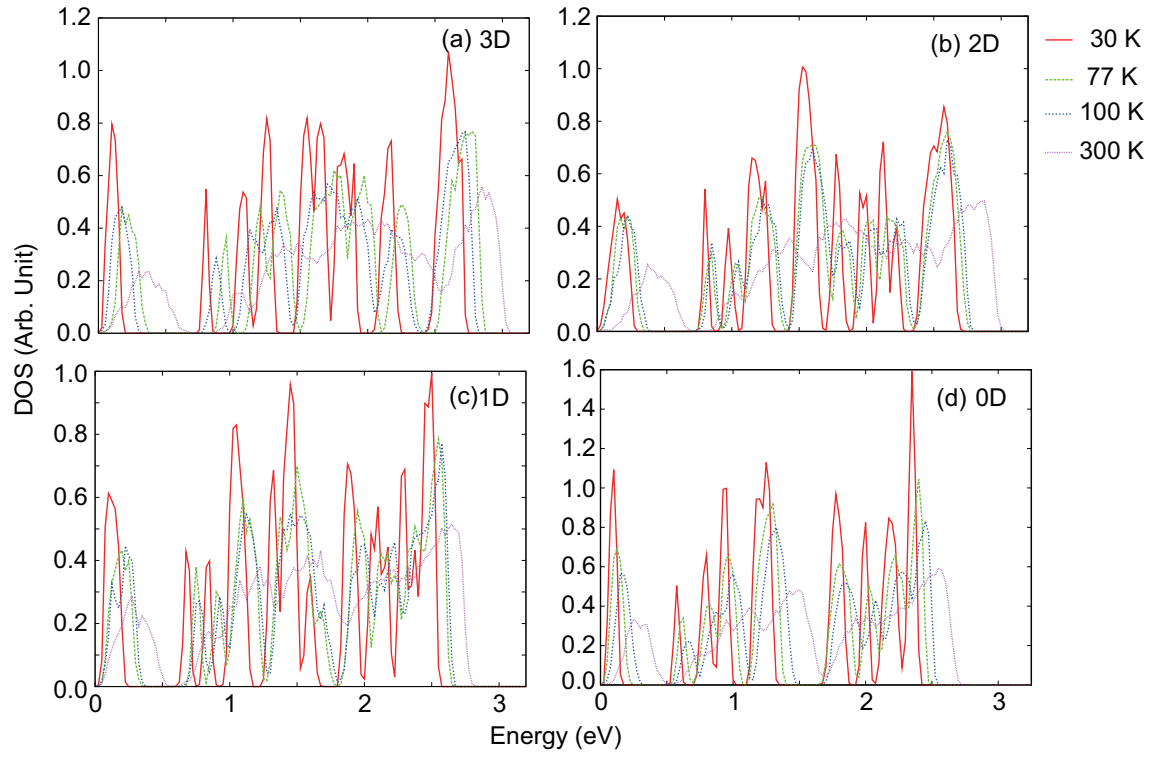

Figure S4: Same as Figure S3 but for the CB states. Each lowest state was shifted to start with 0 eV for their clear comparison.

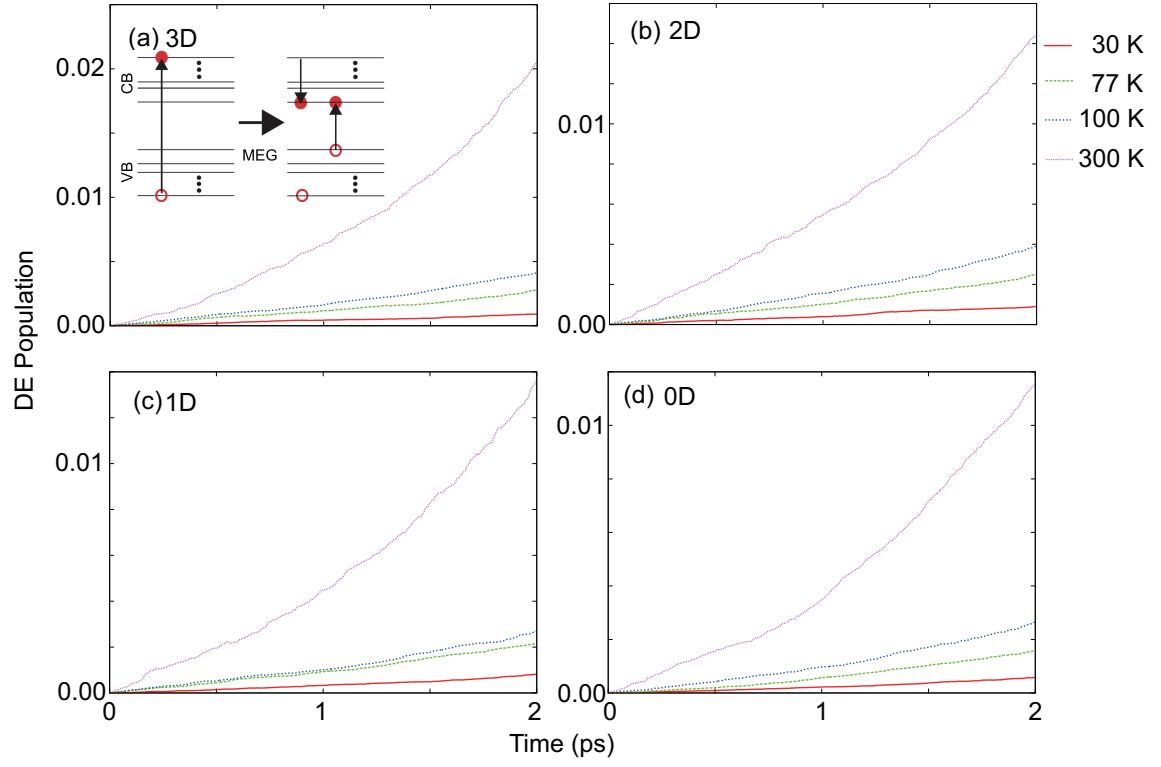

Figure S5: Time-dependent DE population generated through the MEG in (a) 3D, (b) 2D, and (c) 1D  $\text{Si}_{29}\text{H}_{24}$  QDSLs and (d) 0D  $\text{Si}_{29}\text{H}_{24}$  QD.
